# Supplementary material for: Evaluation of a Questionnaire Measuring University Students’ Sense of Belonging to and Involvement in a Biology Department
Source: Atypon-hosted journal article supplement (doi:10.1187/cbe.19-09-0166), 2020-07-14
Supplement: combinedsupmats.pdf [file combinedsupmats.pdf]

# Supplemental Material

*CBE—Life Sciences Education*

Knekta *et al.*

Supplement material 1.

Version 1 of the DeSBI questionnaire. Including information from cognitive interviews

| Item                                                                                                                                                                     | Conclusions from cognitive interviews                                                                                                                                                                                      |
|--------------------------------------------------------------------------------------------------------------------------------------------------------------------------|----------------------------------------------------------------------------------------------------------------------------------------------------------------------------------------------------------------------------|
| <b>Sense of belonging</b>                                                                                                                                                |                                                                                                                                                                                                                            |
| <p><b>Question prompt:</b> Please rate your agreement with the following statements based on how you feel about the [THE NAME OF THE UNIVERSITY] biology department.</p> | <p>Prompt changed to: Please rate your agreement with the following statements based on how you feel about the Department of Biological Sciences at [THE NAME OF THE UNIVERSITY] (here called the biology department).</p> |
|                                                                                                                                                                          | <p>To make each item cleaner (<i>here called the biology department</i>) was added to the prompt and [THE NAME OF THE UNIVERSITY] was removed from each item.</p>                                                          |
| <p>I feel like a real part of the [THE NAME OF THE UNIVERSITY] biology department.</p>                                                                                   |                                                                                                                                                                                                                            |
| <p>People here notice when I'm good at something.</p>                                                                                                                    |                                                                                                                                                                                                                            |
| <p>It is hard for people like me to be accepted here.</p>                                                                                                                |                                                                                                                                                                                                                            |
| <p>Other students at the [THE NAME OF THE UNIVERSITY] biology department take my opinions seriously.</p>                                                                 |                                                                                                                                                                                                                            |
| <p>Most instructors at the [THE NAME OF THE UNIVERSITY] biology department are interested in me.</p>                                                                     | <p><i>Instructors change to faculty and staff.</i> Students told stories of other staff than instructors being interested in them.</p>                                                                                     |
| <p>Sometimes I don't feel as if I belong here.</p>                                                                                                                       |                                                                                                                                                                                                                            |
| <p>There's at least one instructor or other [THE NAME OF THE UNIVERSITY] biology faculty member at the department I can talk to if I have a problem.</p>                 | <p>Changed to: There's at least one instructor or other biology faculty or staff at the department I can talk to if I have a problem.</p>                                                                                  |
| <p>People at the [THE NAME OF THE UNIVERSITY] biology department are friendly to me.</p>                                                                                 |                                                                                                                                                                                                                            |
| <p>Instructors here are not interested in people like me.</p>                                                                                                            | <p>Removed. Students didn't know how to interpret <i>people like me</i>.</p>                                                                                                                                               |
| <p>I am included in lots of activities at the [THE NAME OF THE UNIVERSITY] biology department.</p>                                                                       |                                                                                                                                                                                                                            |
| <p>I am treated with as much respect as other students.</p>                                                                                                              |                                                                                                                                                                                                                            |
| <p>I feel very different from most other students here.</p>                                                                                                              | <p>Removed. Ambiguous interpretation. Some students thought being different was something good and others something bad.</p>                                                                                               |
| <p>I can really be myself at the [THE NAME OF THE UNIVERSITY] biology department.</p>                                                                                    |                                                                                                                                                                                                                            |
| <p>The instructors here respect me.</p>                                                                                                                                  | <p><i>Instructors change to faculty and staff.</i></p>                                                                                                                                                                     |

People here know I can do good work.

I wish I were in a different department

I feel proud of belonging to the [THE NAME OF THE UNIVERSITY] biology department.

Other students here like me the way I am.

Items added after the cognitive interviews.

Faculty and staff at the biology department value my opinions.

Students in the biology department help each other to succeed.

I have a good relationship with other students at the biology department.

The instructors here give me compliments when I do something good.

Faculty and staff in the biology department really want me to succeed.

---

### **Involvement**

---

Please rate your agreement with the following statements.

During this academic year, it is likely that I will:

participate in undergraduate research in the [THE NAME OF THE UNIVERSITY] biology department.

interact closely with a [THE NAME OF THE UNIVERSITY] biology faculty member outside of class.

talk about my career plans with a [THE NAME OF THE UNIVERSITY] biology faculty member.

discuss course topics, ideas, or concepts with a [THE NAME OF THE UNIVERSITY] biology faculty member outside of class.

discuss your academic performance with a [THE NAME OF THE UNIVERSITY] biology faculty member.

discuss undergraduate research opportunities with a [THE NAME OF THE UNIVERSITY] biology faculty member.

ask for advice from a [THE NAME OF THE UNIVERSITY] biology faculty member on something other than on a research project.

attend the office hours of a [THE NAME OF THE UNIVERSITY] biology faculty member.

read a research paper from a [THE NAME OF THE UNIVERSITY] biology faculty member.

attend a research seminar by a [THE NAME OF THE UNIVERSITY] biology faculty member.

visit the lab of a [THE NAME OF THE UNIVERSITY] biology faculty member.

*Unpaid and paid* were added. Students were not sure about what to consider as *participate in undergraduate research*.

Outside of class was added to clarify that discussion inside class not should be considered.

*Who is not my instructor* was added to clarify that advices given in class not should be considered.

Item changed to *attend a seminar hosted by the biology department*. Students were unsure if the seminar were hold by a biology faculty member. It seemed easier to know who hosted the seminar.

join a biology-related student group at [THE NAME OF THE UNIVERSITY].

attend a poster on research from a [THE NAME OF THE UNIVERSITY] biology faculty member.

join a [THE NAME OF THE UNIVERSITY] biology-related volunteer work or community service.

participate in a [THE NAME OF THE UNIVERSITY] biology-related internship.

*Student group* changed to *student club*. The meaning of *student group* was unclear. Many students had a stronger relation to *student club*.

Removed. Many students had problems with interpreting the meaning of *a poster on research*. None had attended one.

Changed to *participate in biology-related volunteer work not connected to research* (e.g. *clean up beaches or volunteer in a state park*). Volunteer work or community service was unclear terms for the students and sometimes difficult to separate from undergraduate research.

Removed. Students had no clear perception of the word *internship*

Item added after the cognitive interviews.

get involved as a PLTL leader at the biology department.

---

Supplement material 2.

Correlation matrix and descriptive statistics for the sense of belonging items, biology majors, second data collection (n=201)

|      | S1   | S2   | S3   | S4   | S5   | S6   | S7   | S8   | S9   | S10  | S11  | S12  | S13  | S14  | S15  | S16  | S17  | S18  | S19  | S20  | S21  |
|------|------|------|------|------|------|------|------|------|------|------|------|------|------|------|------|------|------|------|------|------|------|
| S1   | 1    |      |      |      |      |      |      |      |      |      |      |      |      |      |      |      |      |      |      |      |      |
| S2   | .68  | 1    |      |      |      |      |      |      |      |      |      |      |      |      |      |      |      |      |      |      |      |
| S3   | .58  | .69  | 1    |      |      |      |      |      |      |      |      |      |      |      |      |      |      |      |      |      |      |
| S4   | .01  | .15  | .08  | 1    |      |      |      |      |      |      |      |      |      |      |      |      |      |      |      |      |      |
| S5   | .49  | .50  | .64  | .09  | 1    |      |      |      |      |      |      |      |      |      |      |      |      |      |      |      |      |
| S6   | .62  | .66  | .63  | .08  | .59  | 1    |      |      |      |      |      |      |      |      |      |      |      |      |      |      |      |
| S7   | .16  | .24  | .08  | .53  | .12  | .19  | 1    |      |      |      |      |      |      |      |      |      |      |      |      |      |      |
| S8   | .41  | .55  | .60  | .17  | .51  | .59  | .1   | 1    |      |      |      |      |      |      |      |      |      |      |      |      |      |
| S9   | .40  | .48  | .59  | .22  | .57  | .57  | .25  | .63  | 1    |      |      |      |      |      |      |      |      |      |      |      |      |
| S10  | .37  | .37  | .50  | .21  | .55  | .41  | .15  | .47  | .66  | 1    |      |      |      |      |      |      |      |      |      |      |      |
| S11  | .49  | .40  | .28  | -.17 | .20  | .40  | .03  | .25  | .27  | .26  | 1    |      |      |      |      |      |      |      |      |      |      |
| S12  | .40  | .40  | .56  | .21  | .54  | .47  | .21  | .46  | .79  | .72  | .23  | 1    |      |      |      |      |      |      |      |      |      |
| S13  | .39  | .38  | .47  | .17  | .53  | .43  | .18  | .42  | .63  | .61  | .27  | .67  | 1    |      |      |      |      |      |      |      |      |
| S14  | .48  | .48  | .52  | .23  | .55  | .54  | .28  | .52  | .70  | .61  | .34  | .69  | .71  | 1    |      |      |      |      |      |      |      |
| S15  | .35  | .38  | .53  | .18  | .55  | .50  | .11  | .50  | .70  | .63  | .14  | .72  | .56  | .67  | 1    |      |      |      |      |      |      |
| S16  | .48  | .55  | .48  | .20  | .38  | .52  | .27  | .50  | .63  | .46  | .39  | .59  | .30  | .61  | .53  | 1    |      |      |      |      |      |
| S17  | -.05 | .06  | .00  | .39  | .09  | .06  | .43  | .11  | .15  | .13  | -.17 | .18  | .20  | .24  | .13  | .11  | 1    |      |      |      |      |
| S18  | .48  | .53  | .59  | .11  | .58  | .58  | .21  | .65  | .65  | .48  | .33  | .50  | .45  | .60  | .53  | .49  | .04  | 1    |      |      |      |
| S19  | .41  | .44  | .42  | .06  | .46  | .41  | .18  | .42  | .59  | .50  | .36  | .54  | .64  | .67  | .51  | .53  | .28  | .58  | 1    |      |      |
| S20  | .36  | .42  | .39  | .19  | .52  | .44  | .23  | .49  | .58  | .65  | .29  | .57  | .68  | .66  | .54  | .50  | .21  | .59  | .66  | 1    |      |
| S21  | .35  | .38  | .50  | .17  | .58  | .46  | .18  | .49  | .64  | .62  | .10  | .68  | .64  | .65  | .72  | .58  | .18  | .55  | .56  | .63  | 1    |
| Mean | 3.6  | 3.9  | 4.2  | 4.4  | 4.4  | 3.8  | 4.1  | 4.2  | 4.8  | 4.9  | 3.3  | 4.9  | 4.8  | 4.6  | 5.0  | 4.6  | 4.5  | 4.3  | 5.0  | 4.9  | 5.0  |
| SD   | 1.6  | 1.5  | 1.4  | 1.4  | 1.2  | 1.4  | 1.6  | 1.7  | 1.2  | 1.0  | 1.6  | 1.2  | 1.2  | 1.3  | 1.1  | 1.3  | 1.5  | 1.4  | 1.0  | 1.0  | 1.1  |
| Skew | -0.1 | -0.4 | -0.8 | -0.9 | -0.9 | -0.3 | -0.6 | -0.6 | -1.2 | -1.1 | 0.2  | -1.5 | -1.3 | -1.2 | -1.6 | -1.1 | -1.0 | -.7  | -1.2 | -1.0 | -1.6 |
| Kurt | -1.1 | -0.9 | 0.1  | -0.2 | 0.7  | -0.8 | -0.9 | -1.0 | 1.3  | 1.4  | -1.1 | 2.4  | 1.5  | 1.0  | 3.1  | 0.9  | -0.1 | -0.4 | 1.8  | 1.5  | 3.0  |

Correlation matrix and descriptive statistics for the involvement scale, biology majors, second data collection (n=201)

|          |      |      |      |      |      |      |      |      |      |      |      |      |      |      |      |      |      |      |
|----------|------|------|------|------|------|------|------|------|------|------|------|------|------|------|------|------|------|------|
|          | I1   | I2   | I3   | I4   | I5   | I6   | I7   | I8   | I9   | I10  | I11  | I12  | I13  | I14  | I15  | I16  | I17  | I18  |
| I1       | 1    |      |      |      |      |      |      |      |      |      |      |      |      |      |      |      |      |      |
| I2       | .69  | 1    |      |      |      |      |      |      |      |      |      |      |      |      |      |      |      |      |
| I3       | .63  | .84  | 1    |      |      |      |      |      |      |      |      |      |      |      |      |      |      |      |
| I4       | .62  | .86  | .87  | 1    |      |      |      |      |      |      |      |      |      |      |      |      |      |      |
| I5       | .55  | .78  | .79  | .80  | 1    |      |      |      |      |      |      |      |      |      |      |      |      |      |
| I6       | .78  | .83  | .83  | .83  | .74  | 1    |      |      |      |      |      |      |      |      |      |      |      |      |
| I7       | .60  | .70  | .70  | .71  | .68  | .79  | 1    |      |      |      |      |      |      |      |      |      |      |      |
| I8       | .56  | .65  | .65  | .68  | .61  | .69  | .63  | 1    |      |      |      |      |      |      |      |      |      |      |
| I9       | .60  | .75  | .68  | .70  | .64  | .79  | .73  | .64  | 1    |      |      |      |      |      |      |      |      |      |
| I10      | .60  | .68  | .68  | .68  | .71  | .72  | .72  | .64  | 0.77 | 1    |      |      |      |      |      |      |      |      |
| I11      | .62  | .68  | .62  | .66  | .66  | .72  | .68  | .63  | 0.79 | .81  | 1    |      |      |      |      |      |      |      |
| I12      | .60  | .53  | .55  | .54  | .53  | .60  | .50  | .58  | 0.59 | .64  | .64  | 1    |      |      |      |      |      |      |
| I13      | .65  | .58  | .61  | .61  | .55  | .62  | .55  | .57  | 0.57 | .61  | .58  | .71  | 1    |      |      |      |      |      |
| I14      | .59  | .57  | .53  | .52  | .47  | .51  | .52  | .47  | 0.51 | .56  | .47  | .50  | .55  | 1    |      |      |      |      |
| I15      | .58  | .65  | .60  | .65  | .56  | .65  | .54  | .52  | 0.66 | .61  | .62  | .51  | .59  | .47  | 1    |      |      |      |
| I16      | .49  | .54  | .58  | .56  | .57  | .56  | .45  | .48  | 0.50 | .50  | .57  | .54  | .59  | .41  | .75  | 1    |      |      |
| I17      | .54  | .49  | .49  | .52  | .49  | .56  | .51  | .50  | 0.44 | .55  | .59  | .55  | .60  | .39  | .64  | .74  | 1    |      |
| I18      | .45  | .48  | .52  | .49  | .51  | .49  | .40  | .42  | 0.41 | .45  | .52  | .43  | .52  | .34  | .64  | .75  | .77  | 1    |
| Mean     | 4.3  | 4.3  | 4.5  | 4.4  | 4.5  | 4.4  | 4.2  | 4.5  | 4.0  | 4.2  | 4.3  | 4.2  | 4.5  | 3.8  | 4.6  | 4.8  | 4.8  | 5.0  |
| SD       | 1.6  | 1.5  | 1.5  | 1.5  | 1.5  | 1.6  | 1.5  | 1.4  | 1.6  | 1.6  | 1.5  | 1.5  | 1.5  | 1.7  | 1.4  | 1.3  | 1.3  | 1.2  |
| Skew     | -0.6 | -0.6 | -1.0 | -0.8 | -0.9 | -0.8 | -0.5 | -0.8 | -0.4 | -0.5 | -0.6 | -0.5 | -0.8 | -0.1 | -0.9 | -1.2 | -1.1 | -1.2 |
| Kurtosis | -1.0 | -0.9 | 0.1  | -0.5 | 0.4  | -0.6 | -0.9 | -0.3 | 1.0  | 0.9  | -0.6 | -0.9 | -0.4 | -1.4 | 0.0  | 1.0  | 0.6  | 0.9  |

Supplement material 3.

Correlation matrix and descriptive statistics for the sense of belonging items, biology majors, third data collection (n=596)

|      | S2    | S3    | S5   | S6    | S8    | S9   | S10   | S12   | S13   | S14   | S15   | S16   | S18   | S19   | S20   | S21   |
|------|-------|-------|------|-------|-------|------|-------|-------|-------|-------|-------|-------|-------|-------|-------|-------|
| S2   | 1     |       |      |       |       |      |       |       |       |       |       |       |       |       |       |       |
| S3   | .75   | 1     |      |       |       |      |       |       |       |       |       |       |       |       |       |       |
| S5   | .60   | .63   | 1    |       |       |      |       |       |       |       |       |       |       |       |       |       |
| S6   | .44   | .52   | .46  | 1     |       |      |       |       |       |       |       |       |       |       |       |       |
| S8   | .45   | .49   | .32  | .45   | 1     |      |       |       |       |       |       |       |       |       |       |       |
| S9   | .65   | .48   | .49  | .65   | .56   | 1    |       |       |       |       |       |       |       |       |       |       |
| S10  | .64   | .58   | .38  | .61   | .56   | .67  | 1     |       |       |       |       |       |       |       |       |       |
| S12  | .43   | .56   | .45  | .44   | .45   | .55  | .49   | 1     |       |       |       |       |       |       |       |       |
| S13  | .29   | .33   | .40  | .27   | .24   | .46  | .28   | .33   | 1     |       |       |       |       |       |       |       |
| S14  | .25   | .40   | .39  | .26   | .33   | .59  | .55   | .31   | .31   | 1     |       |       |       |       |       |       |
| S16  | .28   | .31   | .44  | .27   | .27   | .47  | .56   | .55   | .31   | .38   | 1     |       |       |       |       |       |
| S18  | .44   | .41   | .47  | .41   | .36   | .52  | .50   | .50   | .62   | .40   | .50   | 1     |       |       |       |       |
| S15  | .45   | .55   | .41  | .43   | .41   | .64  | .44   | .60   | .53   | .57   | .51   | .46   | 1     |       |       |       |
| S19  | .39   | .39   | .42  | .33   | .37   | .53  | .48   | .47   | .54   | .62   | .58   | .41   | .39   | 1     |       |       |
| S20  | .27   | .37   | .51  | .28   | .34   | .45  | .51   | .52   | .62   | .63   | .51   | .37   | .27   | .62   | 1     |       |
| S21  | .44   | .55   | .39  | .43   | .42   | .64  | .45   | .52   | .44   | .45   | .69   | .48   | .50   | .54   | .49   | 1     |
| Mean | 3.69  | 4.12  | 4.47 | 3.41  | 4.38  | 4.86 | 4.88  | 5.14  | 5     | 4.72  | 4.92  | 4.05  | 3.93  | 4.12  | 4.95  | 4.95  |
| SD   | 1.43  | 1.23  | 1.09 | 1.38  | 1.48  | 1.08 | 1.14  | 0.93  | 0.99  | 1.13  | 0.98  | 1.38  | 1.5   | 1.23  | 0.94  | 1.03  |
| Skew | -0.2  | -0.74 | -0.9 | 0.04  | -0.82 | -1.4 | -1.35 | -1.56 | -1.33 | -1.15 | -1.54 | -0.55 | -0.46 | -0.74 | -1.21 | -1.34 |
| Kurt | -0.92 | 0.14  | 0.71 | -0.91 | -0.38 | 2.55 | 2.01  | 3.74  | 2.62  | 1.36  | 3.78  | -0.51 | -0.9  | 0.14  | 2.32  | 2.34  |

Correlation matrix and descriptive statistics for the involvement scale, biology majors, third data collection (n=596)

|          | I1    | I2    | I3    | I4    | I5    | I7    | I8    | I9    | I10   | I11   | I12   | I13   | I14   |
|----------|-------|-------|-------|-------|-------|-------|-------|-------|-------|-------|-------|-------|-------|
| I1       | 1     |       |       |       |       |       |       |       |       |       |       |       |       |
| I2       | .61   | 1     |       |       |       |       |       |       |       |       |       |       |       |
| I3       | .50   | .70   | 1     |       |       |       |       |       |       |       |       |       |       |
| I4       | .51   | .71   | .72   | 1     |       |       |       |       |       |       |       |       |       |
| I5       | .43   | .64   | .68   | .73   | 1     |       |       |       |       |       |       |       |       |
| I7       | .40   | .50   | .59   | .58   | .59   | 1     |       |       |       |       |       |       |       |
| I8       | .41   | .48   | .52   | .53   | .57   | .47   | 1     |       |       |       |       |       |       |
| I9       | .51   | .49   | .49   | .48   | .41   | .48   | .51   | 1     |       |       |       |       |       |
| I10      | .47   | .50   | .49   | .52   | .49   | .46   | .50   | .69   | 1     |       |       |       |       |
| I11      | .54   | .56   | .52   | .58   | .50   | .54   | .47   | .61   | .66   | 1     |       |       |       |
| I12      | .44   | .43   | .44   | .45   | .41   | .39   | .39   | .37   | .47   | .52   | 1     |       |       |
| I13      | .47   | .42   | .40   | .39   | .39   | .41   | .35   | .41   | .49   | .47   | .54   | 1     |       |
| I14      | .41   | .34   | .22   | .30   | .25   | .26   | .28   | .27   | .32   | .36   | .36   | .37   | 1     |
| Mean     | 3.67  | 4.07  | 4.4   | 4.2   | 4.35  | 3.98  | 4.54  | 3.83  | 3.92  | 3.91  | 4.19  | 4.38  | 3.55  |
| SD       | 1.57  | 1.43  | 1.4   | 1.4   | 1.36  | 1.56  | 1.29  | 1.46  | 1.43  | 1.54  | 1.52  | 1.42  | 1.57  |
| Skew     | -0.12 | -0.54 | -0.88 | -0.68 | -0.84 | -0.38 | -0.94 | -0.31 | -0.39 | -0.3  | -0.54 | -0.72 | 0.02  |
| Kurtosis | -1.18 | -0.69 | -0.05 | -0.39 | -0.02 | -1.01 | 0.29  | -0.87 | -0.77 | -1.04 | -0.75 | -0.42 | -1.16 |
